# Supplementary material for: Algorithm for continual monitoring of fog life cycles based on geostationary satellite imagery as a basis for solar energy forecasting
Source: Copernicus journal article supplement (doi:10.5194/egusphere-2023-2885), 2024-04-26
Supplement: Supplementary file [file egusphere-2023-2885-AC2-supplement.pdf]

**Manuscript number:** EGUSPHERE-2023-2885

**Old title:** Algorithm for continual monitoring of fog life cycles based on geostationary satellite imagery as a basis for solar energy forecasting

**New title:** Algorithm for continual monitoring of fog life cycles based on geostationary satellite imagery

**Submitted to:** Atmospheric Measurement Techniques (AMT)

Dear anonymous reviewer,

On behalf of all authors, we would like to kindly thank you for your very constructive comments and suggestions, and as well for spending your precious time on reviewing our manuscript.

Please find below our answers to your inquiries.

Note that the list of references mentioned in this document is given on the last page.

Sincerely yours,  
Babak Jahani, Jan Cermak

## Referee #2:

### Summary

- This paper presents a method of low stratus and fog (FLS) detection day and night time detection. The novelty is to train a machine learning algorithm (XGBOOST) using open observations from airport weather stations (METAR) and Meteosat Second Generation IR observations.
- The general methodology is robust and the results are sufficiently interpreted.

### Comments

#### C#2.1

The position of paper considers as state-of-the-art only "the well-established and well-validated SOFOS". Which is a daytime technique. However, the SAF NWC products, operationnal since 2016, provides FLS detection day and night. The Optimal Cloud Analysis proposes also a day night cloud top height product. We can also cite MSG-CPP from KNMI and APOLLO-NG recently developped by the DLR. Even if SOFOS is certainly an excellent reference to test this new algorithm, this paper cannot ignore the state-of-start. For a complete analysis, if a day and night product exists, authors must compare their algorithms with them, not only from SOFOS which has been developed within the same team.

#### A#2.1

Thank you for the insightful comments and suggestions. We appreciate your emphasis on comparing our technique with relevant methods, and we agree that our study can benefit from comparison with external FLS products. In response, we actively sought out a SEVIRI-based FLS classification product; however, we found that none of the mentioned products directly fit our study requirements.

Here are the main reasons:

- **NWC-SAF:** as mentioned on the webpage <https://www.nwcsaf.org/>, mainly provides software packages plus some output product images (as a reference to what users can obtain), rather than public products. Generating comparable data would require implementing their algorithm with user-specific settings and auxiliary data from ECMWF, leading to non-standardized results. For this reason, although algorithm for deriving "cloud type" is presented in the software package manual ([https://www.nwcsaf.org/Downloads/GEO/2021.2/Documents/Scientific\\_Docs/NWC-CDOP3-GEO-MF-CMS-SCI-UM-Cloud\\_v2.0.3.pdf](https://www.nwcsaf.org/Downloads/GEO/2021.2/Documents/Scientific_Docs/NWC-CDOP3-GEO-MF-CMS-SCI-UM-Cloud_v2.0.3.pdf)), and the example outputs are visualized in <https://www.nwcsaf.org/web/guest/nec/geo-geostationary-archive>, based on our best knowledge, this data is not publicly available for order to on any EUMETSAT related platforms. Additionally, it should be noted that although this software can be applied over day and night, it does not mean that it is the same algorithm applied over night and day: as mentioned in Section 3.3 of

[https://www.nwcsaf.org/Downloads/GEO/2021.2/Documents/Scientific\\_Docs/NWC-CDOP3-GEO-MF-CMS-SCI-UM-Cloud\\_v2.0.3.pdf](https://www.nwcsaf.org/Downloads/GEO/2021.2/Documents/Scientific_Docs/NWC-CDOP3-GEO-MF-CMS-SCI-UM-Cloud_v2.0.3.pdf), this software uses the SEVIRI channels “R0.6 $\mu$ m R1.38 $\mu$ m T3.8 $\mu$ m T7.3 $\mu$ m T8.7 $\mu$ m T10.4 $\mu$ m T10.8 $\mu$ m T12.0 $\mu$ m” for cloud classification. Among them, “R0.6 $\mu$ m R1.38 $\mu$ m T3.8 $\mu$ m” are solar zenith angle dependent, which are taken out or affected by the intensity of daylight. The changes taken place in the classification due to algorithm switch can be clearly observed in the visualized outputs of the software in <https://www.nwcsaf.org/web/guest/nec/geo-geostationary-archive> (a good example can be seen when inspecting the following dates: 21-11-2023, 23-11-2023, 27-11-2023, ...).

- **MSG-CPP from KNMI** (<https://msgcpp.knmi.nl/>): This product provides cloud mask, top height, temperature, phase, and other cloud properties, but it does not include cloud classification or FLS-specific information. These products are retrieved based on the NWC-SAF software and ECMWF model outputs. Cloud top height could be a relevant dataset at first glance, but it by itself cannot be used for a comparison. In fact, deriving FLS data from this product would necessitate developing a new method based on cloud-top height thresholds to be defined, which would again involve us as developers, limiting the benefit of an external comparison.
- **EUMETSAT Optimal Cloud Analysis** product (<https://navigator.eumetsat.int/product/EO:EUM:DAT:MSG:OCA>): similar to MSG-CPP provides cloud related data, but no cloud classification/type information is present in this product. Thus, it does not include FLS classification, limiting its applicability to our work.
- **DLR APOLLO-NG**: Unfortunately, we could not locate publicly available data for this product.
- **EUMETSAT Cloud Top Height (CTH)**: Although this product includes cloud height information, it cannot be directly interpreted as a FLS mask. The manual of this product even clearly states that extracting fog information would require future enhancements in Section 10.3.2.3. Therefore, deriving FLS data from this product would necessitate developing a new method by defining and applying threshold values, which would again involve us as developers, limiting the benefit of an external comparison. Additionally, it should be noted that a first step to cloud top height determination in this approach is cloud detection, which similar to the products mentioned above, comprises of separate day- and night-time approaches.

Given these points, SOFOS remains the most suitable reference for our purposes, as it provides standardized outputs and aligns with the objectives of our study. We hope this addresses the rationale behind our comparison choices.

In line with this comment and #C1.1 (first comment from referee #1), we have added a new figure to the manuscript (i.e., Figure 3) which shows 1) applicability and consistency of the algorithm over day and night as well as during day-night transitions, 2) applicability over water and land/water transition regions, and 3) consistency of the classifications with the observed radiances.

Furthermore, for the same objectives we had provided an animation presented in the supplementary material S1 (downloadable from <https://zenodo.org/records/10244714>) in the initial submission. In this animation, the left-hand panel shows a false-color RGB image constructed based on the SEVIRI raw channel data with the red, green, and blue channels being  $BT_{12.0} - BT_{13.4}$ ,  $BT_{8.7} - BT_{12.0}$ , and  $BT_{10.8} - BT_{12.0}$ , respectively. In this panel, the green color represents the high clouds, and the light and dark red colors represent the clear-sky and FLS, respectively. The right-hand panel of this animation also shows the outputs of the ML FLS detection algorithm developed in the present study.

---

## **C#2.2**

Reading this paper was quite difficult. An effort should be made to shorten and simplify argumentations.

### **C#2.2.1**

Especially, paragraph 2.4 is extremely long and should be shortened with the help of the very clear Table 1. Moreover 2.4 should be divided in several sub sections (e.g FLS label characteristics can be separated from dataset building).

### **A#2.2.1**

Thank you for your suggestion. Section 2 was divided into two sections (i.e., section 2: data, and section 3: methods). The section named as 2.4 in the original submission was split into 3 sections: “2.4 FLS labels”, “2.5 FLS flag quality assessment”, and “2.6 Training and testing datasets”. The section named as “Machine learning algorithm” in the original submission was also split into two sections, namely “Machine learning algorithm” and “Feature selection”.

Please note that we had also included Figure A1 in the initial submission to facilitate the reading and understanding of the FLS label generation process.

---

### **C#2.2.2**

Paragraph 2.5 shows some useless repetition such as the list of channel and channel combination which is written twice (and a third time in the conclusion paragraph).

### **A#2.2.2**

Section 2.5 has now been revised. We would rather be keeping information in the conclusion for the readers who would like to read the abstract and jump to the conclusions.

To make the section naming more consistent with the content, conclusions sections was renamed to “Summary, Conclusions and outlook”.

---

### **C#2.2.3**

Lines from 304 to 320 could be synthetised in a table (this is just a suggestion)

### **A#2.2.3**

Equations and their explanations were moved to appendix (B).  
The naming of the confusion matrix related terms was modified, and their descriptions were synthesized in a table to facilitate the reading and understanding.

---

### **C#2.2.4**

Lines 374-380 repeat arguments already in paragraph 2.4

### **A#2.2.4**

In line with your suggestion, the mentioned lines were removed.

---

### **C#2.2.5**

Lines from 385 to 390 are a simple repetition of information visible in figure 2.

### **A#2.2.5**

In line with your suggestion, the mentioned lines were removed.

---

## **C#2.3 Detailed remarks :**

### **C#2.3.1**

Line 85 and 109 : centered instead of "cantered"

### **A#2.3.1**

Corrected!

---

### **C#2.3.2**

Line 114 please give the reference (website) to find METAR data

### **A#2.3.2**

Reference to the METAR data is  
<https://mesonet.agron.iastate.edu/request/download.phtml>  
We have updated the “data availability” section accordingly.

---

### **C#2.3.3**

Line 145 : precise in which EUMETSAT product did you find elevation above sea level ?

### **A#2.3.3**

Thank you for noticing. It was obtained from EUMETSAT LSA-SAF auxiliary data at <https://lsa-saf.eumetsat.int/en/user-support/auxiliary-data/>, last access:

16.01.2023. We have updated the figure caption and the “data availability” section accordingly.

---

**C#2.3.4**

Line 194 : why only per winter year ?

**A#2.3.4**

The summer months (i.e., June, July, and August) were excluded from the analysis because the FLS occurrence frequency is very low over these months (Egli et al., 2017) and their inclusion in the analysis largely affects the imbalance between the observed FLS positive and negative cases. This argument has been outlined in the revised manuscript. Please see lines 110-113 of the revised manuscript.

---

**C#2.3.5**

Line 214 : why did you choose to do a quality check after division the datasets ?  
There is risk of unbalanced dataset size.

**A#2.3.5**

This was done because the goal was to sample data based on different FLS regimes. Whereas quality checks were applied mainly to flag data points that are likely to represent homogeneous sky conditions. This explanation was added to the revised manuscript in Section 3.3 at lines 245-248.

---

**C#2.3.6**

Line 244 : test3 (0.2%) is certainly test4

**A#2.3.6**

Thanks for noticing. Corrected!

---

**C#2.3.7**

Line 260 What is the "previous model" ?

**A#2.3.7**

Here, we are referring to the regression tree ensembles. The term “previous model” was changed to “previous regression tree” to clarify the matter.

---

**C#2.3.8**

Line 444 ":Although" with lower case after ":"

**A#2.3.8**

Corrected!

---

## References

Egli, S., Thies, B., Drönner, J., Cermak, J., and Bendix, J.: A 10 year fog and low stratus climatology for Europe based on Meteosat Second Generation data, *Q. J. R. Meteorol. Soc.*, 143, 530–541, <https://doi.org/10.1002/qj.2941>, 2017.
